# Supplementary material for: Degradation of Sargassum crassifolium Fucoidan by Ascorbic Acid and Hydrogen Peroxide, and Compositional, Structural, and In Vitro Anti-Lung Cancer Analyses of the Degradation Products
Source: PubMed Central journal article supplement (PMC7345171; doi:10.3390/md18060334), 2020-06-26

## Supplementary Information

**Figure S1.** NMR analyses of SC, SCA, SCH, and SCAH. (A)  $^1\text{H}$ -NMR spectra for SC, SCA, SCH, and SCAH. (B)  $^{13}\text{C}$ -NMR spectra for SC, SCA, SCH, and SCAH. The characteristic peaks are indicated in each graph.

**Figure S1.** NMR analyses of SC, SCA, SCH, and SCAH. (A)  $^1\text{H}$ -NMR spectra for SC, SCA, SCH, and SCAH. (B)  $^{13}\text{C}$ -NMR spectra for SC, SCA, SCH, and SCAH. The characteristic peaks are indicated in each graph.

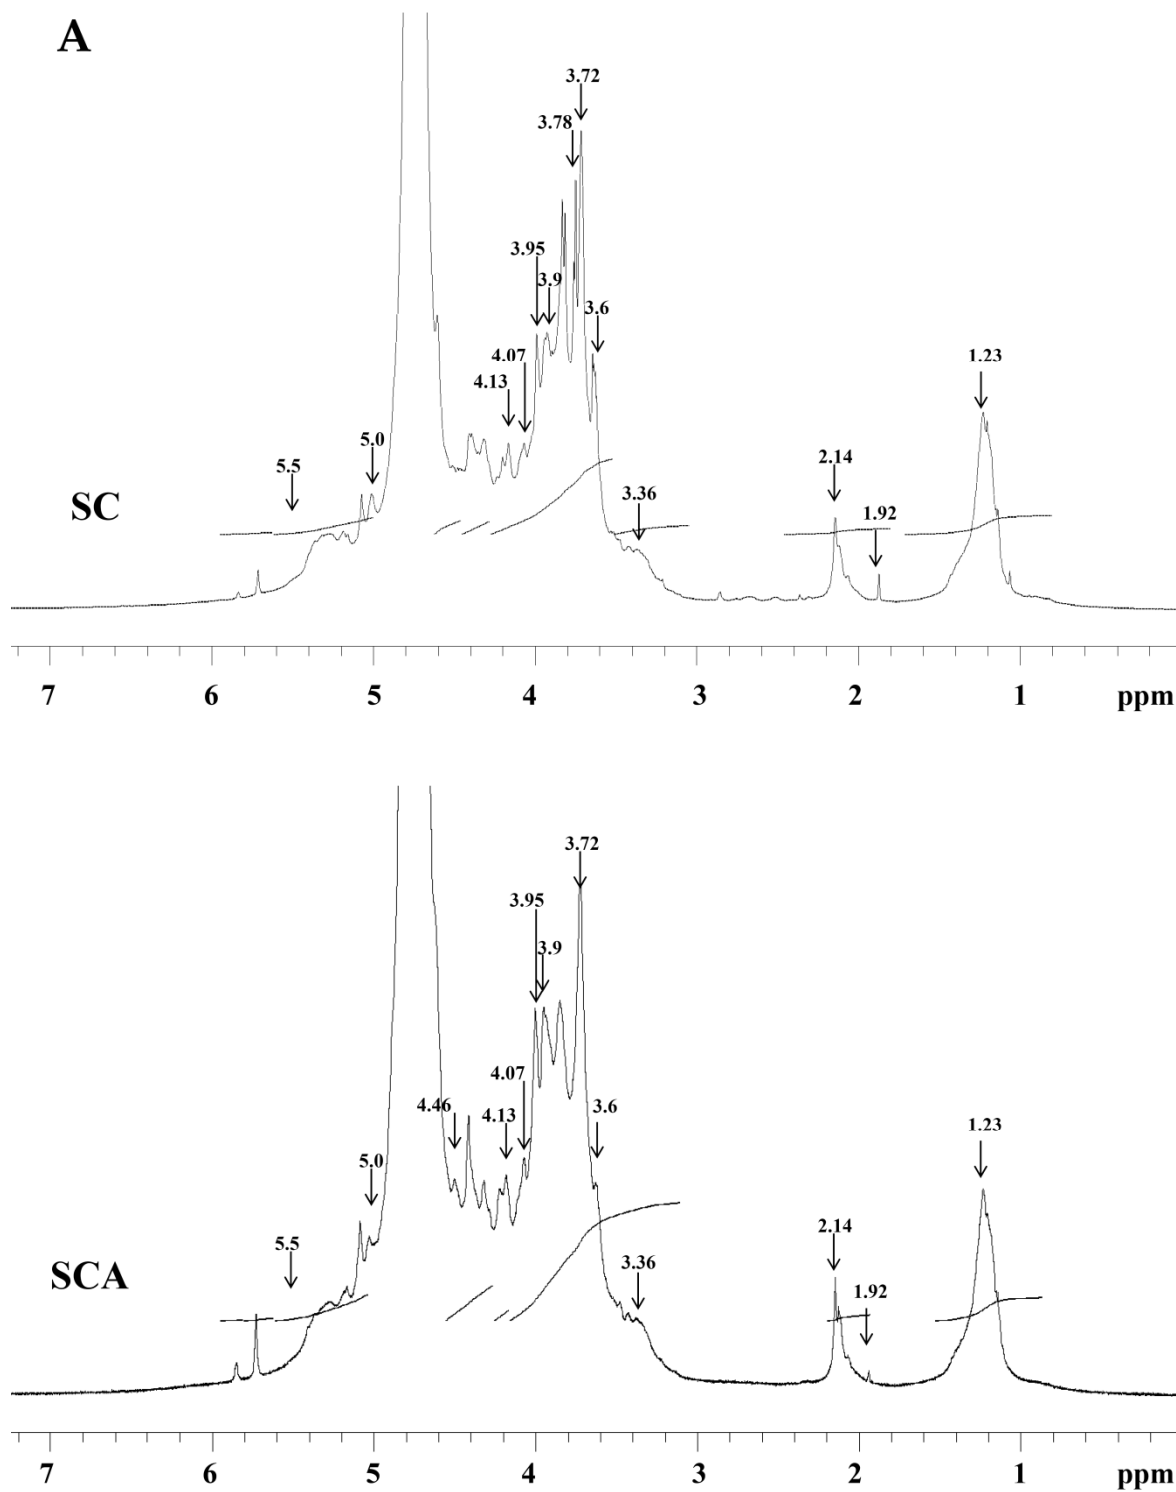

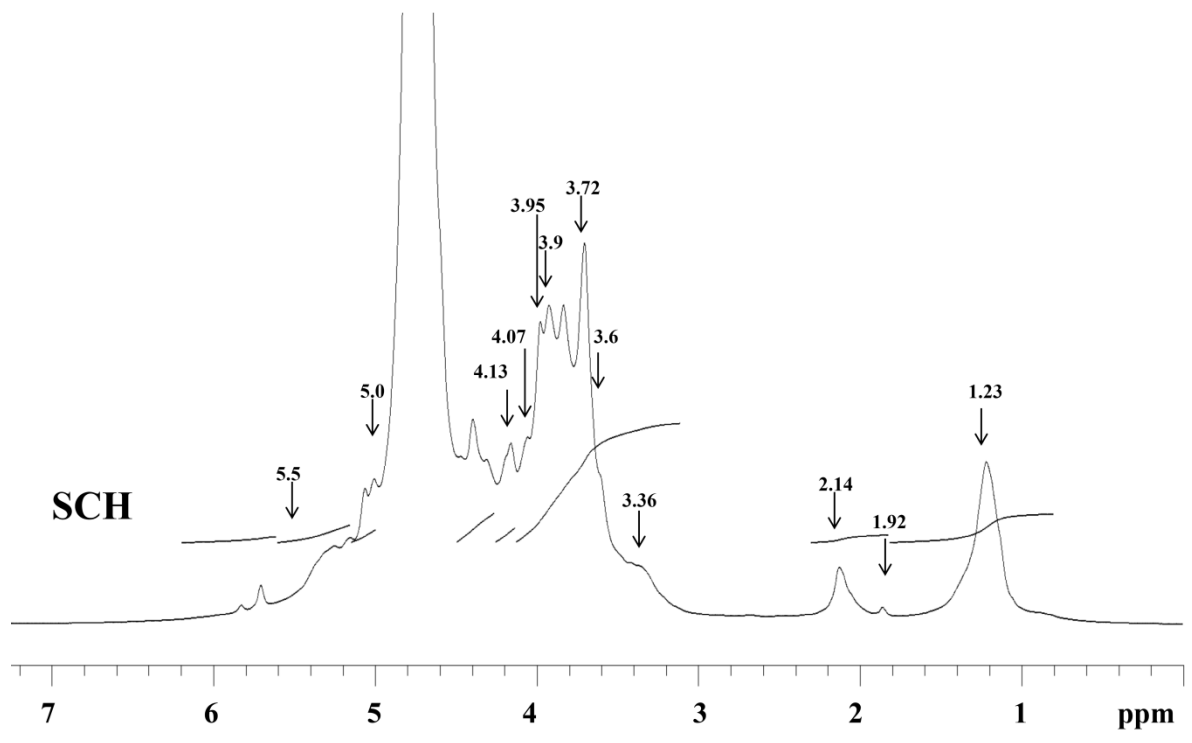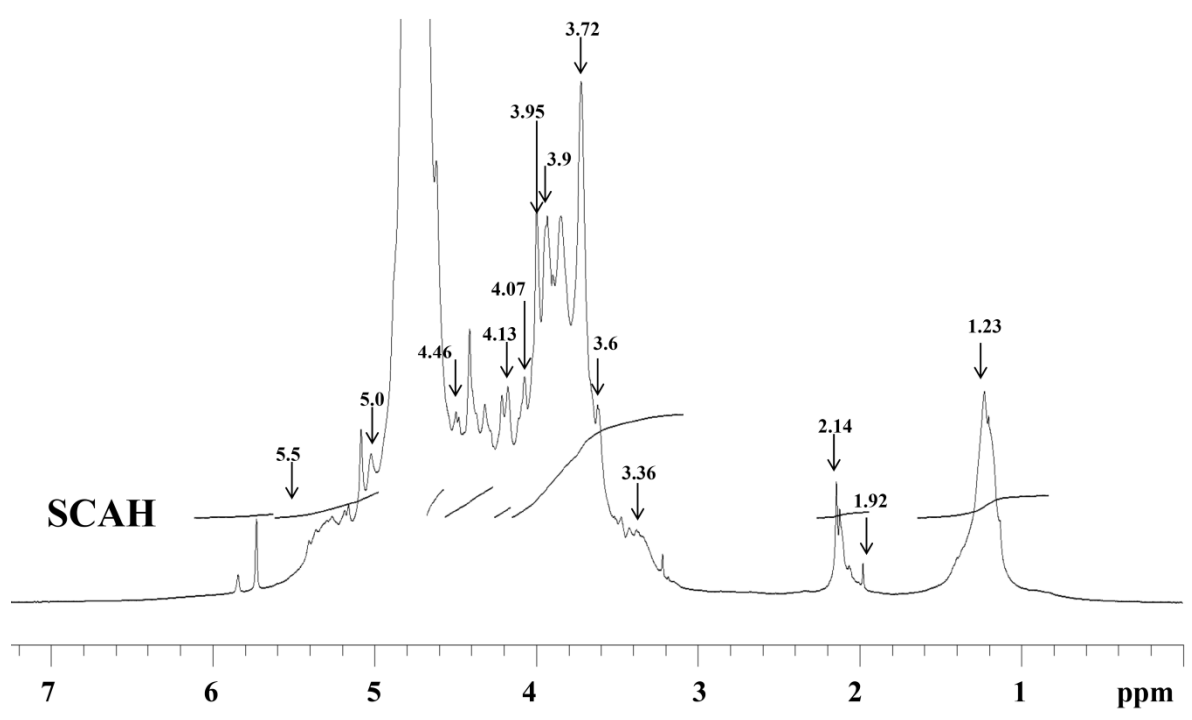

**B**

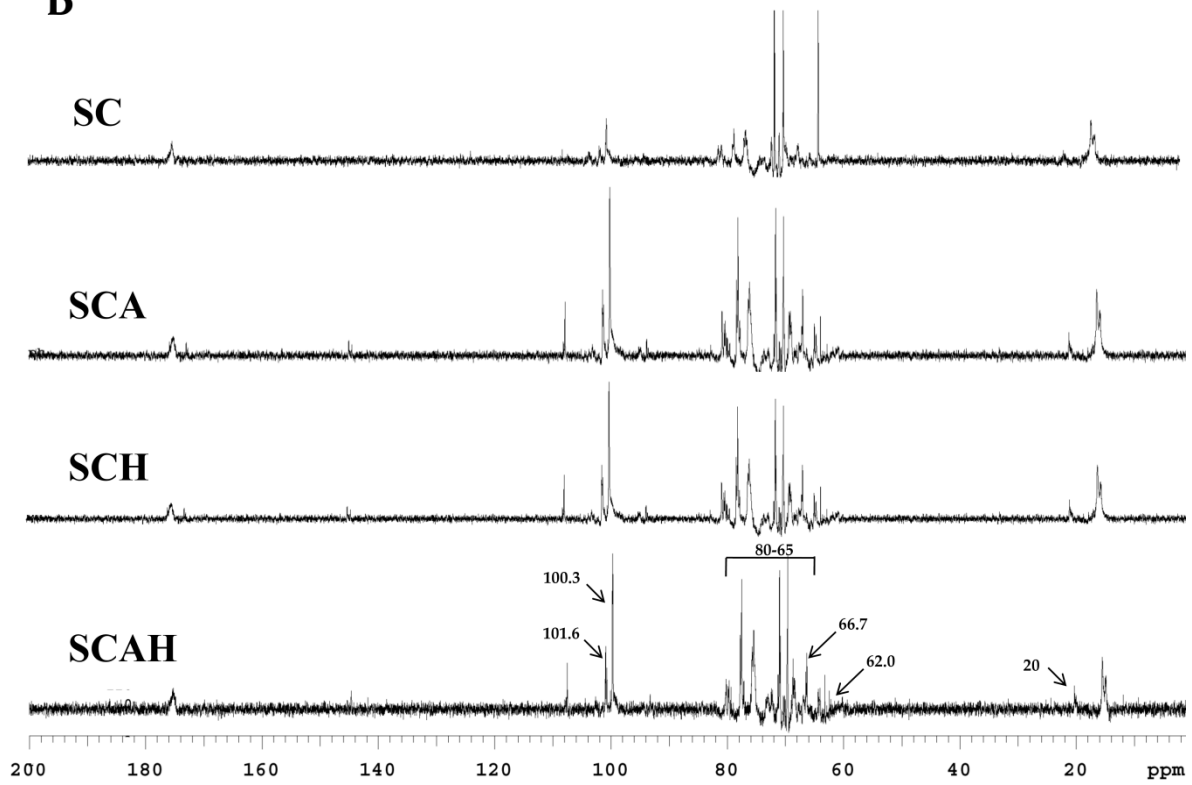

Supplement: marinedrugs-18-00334-s001.pdf [file marinedrugs-18-00334-s001.pdf]
